# Supplementary material
Source: PubMed Central journal article supplement (PMC2733807)
Supplement: ddp243_1.pdf [file ddp243_1.pdf]

## **Supplemental data**

### **Supplemental experimental procedures**

#### **HPLC assay:**

Briefly, mice were sacrificed by cervical dislocation and hind limbs were immediately (within 1~2 seconds) dropped into the liquid nitrogen for a snap freezing. Skeletal muscle was quickly dissected on a mechanically refrigerated (-40°C) thermal plate (Sigma, San Diego, CA). 200µl ice cold acetonitrile was added to frozen tissues and tissues were homogenized with a pellet pestle while adding 100 µl ice-cold ddH<sub>2</sub>O. The homogenate was centrifuged at 14,000 rpm, 4°C for 15 min and 150µl supernatant was added with 150µl ddH<sub>2</sub>O, centrifuged again and ready for HPLC assay. Standards were prepared exactly in the same way. 50 µl of the preparation was injected to a HPLC system which comprises a Perkin Elmer M-250 binary LC pump (Norwalk CT), a Waters 717 plus autosampler, a Waters 490 programmable multi-wavelength UV detector (Milford, MA) and an ESA 501 chromatography data process system (Chelmsford, MA). The gradient elution was performed on a TSK-GEL HPLC column (Tosoh Biosep, Japan) with a mobile phase rate of 1ml/min by two buffers. Buffer A contained 25mM NaH<sub>2</sub>PO<sub>4</sub>, 100mg/L tetrabutylammonium with pH5.5, whereas organic buffer B was 10%(v/v) acetonitrile made in a buffer of 200mM NaH<sub>2</sub>PO<sub>4</sub>, 100mg/L tetrabutylammonium, pH 4.0. The UV detector was programmed 210 nm from 0 to 14 min for detecting creatine and phosphocreatine which appeared at about 3.7 and 10 minutes respectively and 260 nm from 10 to 40 min for AMP, ADP and ATP which were eluted out at about 18, 22 and 25 min respectively. The standard curve of each compound was constructed by plotting peak heights (mV) vs. concentrations range from 10~1000 µM for creatine and phosphocreatine and 5~500 µM for ATP and its metabolites. The quantification was carried out using the external standard calibration. Protein concentrations were measured by using BCA protein assay kit (Pierce, USA). Data were expressed as nmol/mg protein.

#### **Transmission Electron Microscopy:**

Soleus muscle were fixed for 1h in 2.5% glutaraldehyde, 4% paraformaldehyde, 0.02% picric acid in 0.1M sodium cacodylate buffer, followed by washing with sodium cacodylate buffer for 3 times. Muscles were post-fixed in 1% OsO<sub>4</sub>-1.5% aqueous K-ferricyanide for 60 min and

stained with 1.5% aqueous Uranyl acetate for 30 min. Samples were then dehydrated through a graded ethanol series, infiltrated, and embedded in Spurr's resin (Electron Microscopy Sciences, Fort Washington, PA, USA). Sections were cut at 55-60 nm (silver-gold) using a Diatome diamond knife-(Diatome, USA, Hatfield, PA) on an RMC MT-7000 Ultra-microtome (Boeckeler-RMC Instruments, Tucson, AZ). Sections were contrasted with lead citrate and viewed on a JSM 100 CX-II electron microscope (JEOL, USA, Inc., Peabody, MA) operated at 80 kV. Images were recorded on Kodak 4489 Electron Image film (Eastman Kodak Company, Rochester, NY, USA) then digitized on an Epson Expression 1600 Pro scanner (Seiko-Epson Corporation, Suwa, Japan) at 900 dpi for publication. Pictures were taken at a magnification of 4,800 and 19,000X. Density and number of mitochondria was analyzed using ImageJ 1.38x image analysis software (NIH, Bethesda, MD) and expressed as % mitochondrial area.

#### **Western blot:**

Tissue samples from the skeletal muscle of WT and HD mouse and myoblast cultures were homogenized in cell extraction buffer containing 50mM Tris-HCl, pH 7.4, 150mM NaCl, 2mM EDTA, 1% SDS, 0.5% NP-40, 0.5% deoxycholate supplemented with protease and phosphatase inhibitors (Sigma). Samples were homogenized, sonicated for 5 seconds and centrifuged at 4000g for 30 min. Protein concentrations of the supernatant were determined using the BCA protein assay, as per the manufacturer's recommended protocol. Equal amounts of protein (45µg) were loaded on to a 4-20% Tricine gel (Invitrogen). Membranes were then blocked for 1h at room temperature in Tris-buffered saline/Tween-20 (TBST) (50mM Tris-HCl, 150mM NaCl, pH 7.4, 1% Tween-20) containing 5% non-fat dried milk. The membranes were incubated overnight at 4°C for PGC-1 $\alpha$  (1:2,000, kind gift of Dr. B.M. Spiegelman), AMPK (1:500, Santa Cruz; CA), pAMPK Thr 172 (1:500, Santa Cruz; CA), and  $\beta$ -actin (1:10,000, Chemicon). Membranes were then washed three times with TBST and incubated for 1h with HRP-conjugated secondary antibody and the immunoreactive proteins detected using a chemiluminescent substrate (Pierce, USA) according to the manufacturer's instructions. Films were scanned by film processor (Konica Minolta & Graphic Inc, SRX-101A, USA). Protein expression was quantified using Scion Image for Windows (NIH, USA).

#### **Myosin heavy chain (MHC) immunohistochemistry**

In brief, 10µm thin sections of soleus muscle were placed onto slides. Commercial antibodies to fast and slow isoforms of myosin were used, each with a different visualization system for specific identification of each fiber type on the same section. After fixation in acetone for 10 min, sections were incubated with monoclonal antibody to skeletal slow anti-myosin NOQ 7.5.4D (1:2,000, Sigma, St Louis, MO, USA) for 30 min, followed by a peroxidase conjugated rabbit anti-mouse secondary antibody (DAKO, USA) for 1h. Results were visualized as dark immunoreactive black type 1 fibers using the commercial Vector SG substrate kit (Vector Labs, USA). The alkaline phosphatase conjugated monoclonal antibody to skeletal fast anti-myosin MY-32 (1:50, Sigma, St Louis, MO, USA) was then applied for 1h, and red type 2 fibers were visualized using the Vector red alkaline phosphatase substrate kit (Vector Labs, USA).

### **Histochemical staining for succinate dehydrogenase (SDH)**

For SDH staining GM were excised and dissected immediately and snap frozen in isopentane upon mouse sacrifice. 10µm thin sections were cut in a cryostat and mounted on cover slip. Sections were then incubated at 37<sup>0</sup>C for 30 min in 0.1 M Tris buffer containing 0.2g sodium succinate, 0.0005g Phenazine methosulphate and 0.02g Nitroblue tetrazolium, followed by extraction in 30%, 60%, 90%, 60% and 30% acetone in sequence. After 3X wash with PBS, sections were mounted with Vectashield Hard Set Mounting medium (Vector H-1400, USA).

### **Rotarod performance**

A rotarod apparatus (Columbus Instruments, Columbus, OH) was used to measure forelimb and hindlimb motor coordination and balance. The rotarod testing was carried out at last week of GPA treatment (26 weeks of age) in the WT and Tg mice. The mice were trained for 3 days on the rotarod at 5 rpm for up to 300 sec, before being tested for 4 days. WT and Tg mice were then placed on an accelerating rotarod (0.1rpm/sec) from 2 to 20 rpm over 180 sec and maintained at 20 rpm up to 300 sec for 4 days of testing with 3 trials per day. To avoid fatigue, animals were rested for 10 min between each trial and the best time from 3 trials for each day was used in the analysis.

### **Measurement of myoblast oxygen consumption**

For oxygen consumption measurement, GPA treated and untreated myoblast cells were fluid-changed with fresh medium 1 h before performing the assays. Cells were collected by mild trypsinization, pelleted by centrifugation, counted, and resuspended at  $2 \times 10^6$  cells/ml in Dulbecco's modified Eagle's medium lacking glucose and pyruvate at 37 °C. A 0.5 ml of cell suspension ( $1 \times 10^6$  cells) was transferred into an oxygraph chamber equipped with a Clark-type electrode (Hansatech). Measurements were performed at basal level and in the presence of pyruvate and dinitrophenol (DNP).

### **Gene Expression Analysis by RT-PCR**

After indicated treatments, tissues were harvested and frozen immediately. Total RNA was isolated from frozen WT and HD mouse skeletal muscle and from cultured myoblast using TriZol Reagent. Genomic DNA was removed using RNase free DNase (Ambion). RNA pellets were resuspended in DEPC-treated water (Ambion). Total RNA purity and integrity was confirmed by ND-1000 NanoDrop (NanoDrop Technologies) and 2100 Bioanalyzer (Agilent) respectively with average 260/280 ratios for all study samples ranging from 1.9 to 2.1 and average RIN numbers ranging from 5.0 to 7.5. All qPCR plating was performed on ice. Real-time RT-PCR was performed using the ABI prism 7900 HT sequence detection system (Applied Biosystems, Foster City, CA) based on the 5'-nuclease assay. Serial dilutions of 320ng/well, 32 ng, and 3.2 ng of total RNA were plated with two representative genes and housekeeping gene  $\beta$ -actin or 18sRNA. Probe cleavage was consistently observed with 320ng/well, with average Ct value of 30, for the two representative genes. Consistent amplification was observed in all three-dilution points for  $\beta$ -actin or 18sRNA. One-step, singleplex, and triplicates of each sample were plated. Working solution of 160ng/ $\mu$ l was prepared for each sample and 2.5 $\mu$ l of this solution, making 400ng/ qPCR well, was distributed to each triplicate qPCR well. A master-mix comprised of One step RT qPCR MasterMix Plus reagents, (no AmpErase UNG, RTQPRT- 032X, EuroGentec, San Diego, CA), 20X TaqMan Gene Expression Assay (Applied Biosystems) and Molecular Biology Grade H<sub>2</sub>O (HyClone) was prepared for each target gene and 5.5 $\mu$ l of this Primer-Probe master-mix was added to the PCR well totaling 8 $\mu$ l qPCR reaction volume. Thermal cycling conditions were 48°C for 30min, 95°C for 10 min and then 45 cycles of 95° C for 15 sec and 60° C for 1 min. Relative expression was calculated using the  $\Delta\Delta$ Ct method. Human specific primer sequences and

mouse specific TaqMan based gene expression assays used for RT-PCR experiments are listed in supplemental data Table S8.

**Supplementary Table S1: Gene set enrichment analysis**

| <b>Groups</b> | <b>Significantly enriched gene pathways</b>                                                                                                                                                                                                                                                                                                                                                                                                                                                                                                                             |
|---------------|-------------------------------------------------------------------------------------------------------------------------------------------------------------------------------------------------------------------------------------------------------------------------------------------------------------------------------------------------------------------------------------------------------------------------------------------------------------------------------------------------------------------------------------------------------------------------|
| <b>WT+NS</b>  | Apoptotic DNA fragmentation and tissue homeostasis pathway [Biocarta],<br>D4-GDI signaling pathway pathway [Biocarta],<br>TGF-beta signaling pathway[KEGG],<br>Olfactory transduction [KEGG],<br>Regulation of p27 phosphorylation during cell cycle progression pathway[Biocarta],<br>Overview of telomerase RNA component gene HTERC transcriptional regulation pathway [Biocarta],<br>Heparan sulfate biosynthesis[KEGG], Focal adhesion [GENMAPP],<br>Monocyte and its surface molecules pathway [Biocarta], Reelin signaling pathway pathway [Biocarta]            |
| <b>HD+NS</b>  | Type II diabetes mellitus [KEGG], HIV induced T cell apoptosis pathway [Biocarta],<br>Regulation of EIF4E and P70 S6 kinase pathway [Biocarta],<br>G-secretase mediated ERBB4 signaling pathway pathway [Biocarta],<br>Acetylcholine synthesis [GENEMAPP],<br>Role of EGF receptor transactivation by GPCRS in cardiac hypertrophy pathway [Biocarta]<br>Malate-aspartate shuttle pathway [Biocarta]                                                                                                                                                                    |
| <b>WT+GPA</b> | Glycolysis / gluconeogenesis [KEGG]<br>Ribosomal biogenesis pathway [Biocarta]<br>G-secretase mediated ERBB4 signaling pathway pathway [Biocarta]<br>Glycolysis and gluconeogenesis [GENMAPP]<br>Muscle, fat and connective tissue specific genes[GENMAPP]<br>Electron transport chain [GENMAPP]<br>Type-II diabetes mellitus [KEGG]<br>Striated muscle contraction [GENMAPP]<br>Oxidative phosphorylation [KEGG]                                                                                                                                                       |
| <b>HD+GPA</b> | Cell to cell adhesion signaling pathway [Biocarta]<br>ADP-ribosylation factor pathway [Biocarta]<br>Activation of SRC by protein-tyrosine phosphatase alpha pathway [Biocarta]<br>Apoptosis modulation by HSP 70 [GENMAPP]<br>Gap junction [KEGG]<br>Adherens junction [KEGG]<br>Tight junction [KEGG]<br>Cell cycle: G2/M checkpoint pathway [Biocarta]<br>Overview of telomerase protein component gene HTERT transcriptional regulation pathway [Biocarta]<br>HIV-I NEF: negative effector of FAS and TNF pathway [Biocarta]<br>Inositol phosphate metabolism [KEGG] |

**Supplementary table S2: Affymetrix microarray analysis of Tricarboxylic acid cycle (TCA) genes**

| Gene symbol | Probe set ID | Gene name                                                     | HD+NS vs WT+NS |         | HD+GPA vs WT+GPA |         |
|-------------|--------------|---------------------------------------------------------------|----------------|---------|------------------|---------|
|             |              |                                                               | Fold change    | p value | Fold change      | p value |
| Idh3a       | 1447701_x_at | isocitrate dehydrogenase 3 (NAD+) alpha                       | 1.27           | 0.218   | 1.54             | 0.0988  |
| Idh3g       | 1416789_at   | isocitrate dehydrogenase 3 (NAD+), gamma                      | 1.04           | 0.766   | -1.04            | 0.598   |
| Idh1        | 1419821_s_at | isocitrate dehydrogenase 1 (NADP+), soluble                   | 1.12           | 0.427   | -1.11            | 0.306   |
| Acly        | 1439459_x_at | ATP citrate lyase                                             | -1.09          | 0.684   | 1.49             | 0.0345  |
|             | 1439445_x_at |                                                               | 1.75           | 0.522   | -4.79            | 0.05    |
| Fh1         | 1424828_a_at | fumarate hydratase 1                                          | 1.11           | 0.448   | -1.03            | 0.658   |
| Mdh1        | 1438338_at   | malate dehydrogenase 1, NAD (soluble)                         | 1.20           | 0.565   | -1.29            | 0.175   |
| Mdh1b       | 1429842_at   | malate dehydrogenase 1B, NAD (soluble)                        | -1.33          | 0.615   | 1.18             | 0.732   |
| Pdha2       | 1450962_at   | pyruvate dehydrogenase E1 alpha 2                             | 2.53           | 0.175   | -1.16            | 0.855   |
| Sdhd        | 1437489_x_at | succinate dehydrogenase complex, subunit D                    | 1.07           | 0.562   | 1.18             | 0.189   |
| Sdhc        | 1435986_x_at | succinate dehydrogenase complex, subunit C, iron sulfur (Ip)  | 1.22           | 0.416   | -1.27            | 0.121   |
| Sdhb        | 1418005_at   | succinate dehydrogenase complex, subunit B, iron sulfur (Ip)  | 1.11           | 0.454   | -1.22            | 0.044   |
| Suclg2      | 1427441_a_at | succinate-Coenzyme A ligase, GDP-forming, beta subunit        | 1.10           | 0.52    | 1.18             | 0.05    |
| Sucla2      | 1430402_at   | succinate-Coenzyme A ligase, ADP-forming, beta subunit        | -1.35          | 0.64    | -1.01            | 0.97    |
| Sdha        | 1445317_at   | Succinate dehydrogenase complex, subunit A, flavoprotein (Fp) | -1.15          | 0.353   | -1.10            | 0.742   |
| Aco1        | 1423644_at   | aconitase 1                                                   | 1.09           | 0.623   | 1.22             | 0.05    |
| Aco2        | 1442102_at   | aconitase 2, mitochondrial                                    | -1.05          | 0.845   | -1.16            | 0.48    |
| Csl         | 1449400_at   | citrate synthase like                                         | -1.06          | 0.852   | -1.43            | 0.0425  |
| Cs          | 1422578_at   | citrate synthase                                              | 1.02           | 0.86    | -1.01            | 0.81    |

**Supplementary table S3: Affymetrix microarray analysis of glycolysis genes**

| Gene symbol | Probe set ID | Gene name                                                           | HD+NS vs WT+NS |         | HD+GPA vs WT+GPA |         |
|-------------|--------------|---------------------------------------------------------------------|----------------|---------|------------------|---------|
|             |              |                                                                     | Fold change    | p value | Fold change      | p value |
| Pgam2       | 1418373_at   | phosphoglycerate mutase 2                                           | -1.07          | 0.534   | -1.32            | 0.0147  |
| Pgam1       | 1426554_a_at | phosphoglycerate mutase 1                                           | -1.29          | 0.0379  | 1.45             | 0.0365  |
| Hk1         | 1437974_a_at | hexokinase 1                                                        | -1.11          | 0.621   | 1.27             | 0.0389  |
| Hk2         | 1422612_at   | hexokinase 2                                                        | -1.16          | 0.174   | -1.22            | 0.247   |
| Aldoa       | 1423498_at   | aldolase 1, A isoform                                               | 1.41           | 0.0138  | -1.74            | 0.0034  |
|             | 1434799_x_at |                                                                     | 1.11           | 0.418   | -1.28            | 0.05    |
| Ldha        | 1419737_a_at | lactate dehydrogenase A                                             | 1.09           | 0.478   | -1.32            | 0.0314  |
| Ldhb        | 1434499_a_at | lactate dehydrogenase B                                             | -1.02          | 0.955   | -1.20            | 0.682   |
| Gpi1        | 1450081_x_at | glucose phosphate isomerase 1                                       | 1.00           | 0.975   | -1.24            | 0.0483  |
| Slc25a3     | 1440302_at   | solute carrier family 25 (mitochondrial carrier, phosphate carrier) | 1.24           | 0.309   | -1.55            | 0.0337  |
| Slc2a3      | 1427770_a_at | solute carrier family 2 (facilitated glucose transporter), member 3 | 1.16           | 0.865   | 4.91             | 0.0111  |
| Eno3        | 1417951_at   | enolase 3, beta muscle                                              | 1.12           | 0.439   | -1.22            | 0.05    |
| Pkm2        | 1417308_at   | pyruvate kinase, muscle                                             | 1.04           | 0.714   | -1.14            | 0.106   |
| Pfkm        | 1416780_at   | phosphofructokinase, muscle                                         | 1.03           | 0.803   | -1.31            | 0.0332  |
| Ogdh        | 1445632_at   | oxoglutarate dehydrogenase (lipoamide)                              | -1.07          | 0.661   | -1.07            | 0.719   |
| Hkdc1       | 1425900_at   | hexokinase domain containing 1                                      | -1.49          | 0.0434  | -1.55            | 0.106   |
| Pfkl        | 1453541_at   | phosphofructokinase, liver, B-type                                  | 1.32           | 0.455   | 1.29             | 0.391   |
| Pdha1       | 1449137_at   | pyruvate dehydrogenase E1 alpha 1                                   | 1.01           | 0.965   | -1.07            | 0.666   |
| Pklr        | 1438711_at   | pyruvate kinase liver and red blood cell                            | 1.33           | 0.37    | -1.54            | 0.0248  |
| Lrrc16      | 1446892_at   | Leucine rich repeat containing 16                                   | -3.37          | 0.0494  | 1.67             | 0.191   |
| Ldhal6b     | 1434247_at   | lactate dehydrogenase A-like 6B                                     | -1.35          | 0.561   | -1.82            | 0.118   |
| Tpi1        | 1452927_x_at | triosephosphate isomerase 1                                         | 1.07           | 0.495   | -1.17            | 0.0416  |



**Supplementary table S4: Affymetrix microarray analysis of fatty acid metabolism genes**

| Gene symbol | Probe set ID | Gene name                                                   | HD+NS vs WT+NS |         | HD+GPA vs WT+GPA |         |
|-------------|--------------|-------------------------------------------------------------|----------------|---------|------------------|---------|
|             |              |                                                             | Fold change    | p value | Fold change      | p value |
| Acot9       | 1449968_s_at | acyl-CoA thioesterase 9 /// acyl-CoA thioesterase 10        | 1.34           | 0.0153  | 1.47             | 0.00885 |
| Acot12      | 1419395_at   | acyl-CoA thioesterase 12                                    | -1.09          | 0.948   | -2.59            | 0.0215  |
| Cpt2        | 1447820_x_at | carnitine palmitoyltransferase 2                            | 1.23           | 0.595   | -1.38            | 0.033   |
| Acox2       | 1420673_a_at | acyl-Coenzyme A oxidase 2, branched chain                   | 1.65           | 0.591   | -1.60            | 0.597   |
| Acs11       | 1447355_at   | acyl-CoA synthetase long-chain family member 1              | -1.34          | 0.746   | -5.57            | 0.0193  |
| Adipoq      | 1447582_x_at | Adiponectin, C1Q and collagen domain containing             | 3.77           | 0.0144  | 1.06             | 0.849   |
| Slc27a2     | 1416316_at   | solute carrier family 27 (fatty acid transporter), member 2 | 1.42           | 0.697   | -2.70            | 0.0309  |
| Slc27a3     | 1427180_at   | solute carrier family 27 (fatty acid transporter), member 3 | -1.28          | 0.666   | -1.42            | 0.0402  |
| Slc27a4     | 1424441_at   | solute carrier family 27 (fatty acid transporter), member 4 | -1.12          | 0.218   | 1.15             | 0.288   |
| Slc27a5     | 1449112_at   | solute carrier family 27 (fatty acid transporter), member 5 | 1.68           | 0.575   | -4.66            | 0.0216  |
| Cry11       | 1459589_at   | crystallin, lamda 1                                         | 2.22           | 0.0331  | 1.04             | 0.956   |
| Acox3       | 1437352_at   | acyl-Coenzyme A oxidase 3, pristanoyl                       | -1.06          | 0.838   | -1.49            | 0.0337  |
| Acs13       | 1452771_s_at | acyl-CoA synthetase long-chain family member 3              | -1.03          | 0.931   | 3.49             | 0.00148 |
| Acs14       | 1433531_at   | acyl-CoA synthetase long-chain family member 4              | -1.00          | 0.988   | 1.39             | 0.204   |
| Scap        | 1446568_at   | SREBP cleavage activating protein                           | 2.19           | 0.0402  | -2.05            | 0.0189  |
| Cpt1c       | 1435281_at   | carnitine palmitoyltransferase 1c                           | -1.56          | 0.476   | 1.88             | 0.0159  |
| Elov12      | 1416444_at   | elongation of very long chain fatty acids-like 2            | 2.00           | 0.445   | -3.13            | 0.0221  |
| Cyp4a10     | 1424853_s_at | cytochrome P450, family 4, subfamily a, polypeptide 10      | 2.54           | 0.334   | -2.67            | 0.0214  |
| Cyp4a12     | 1424352_at   | cytochrome P450, family 4, subfamily a, polypeptide 12      | -6.15          | 0.0128  | 1.29             | 0.859   |
| Gpam        | 1425834_a_at | glycerol-3-phosphate acyltransferase, mitochondrial         | -1.15          | 0.494   | 1.19             | 0.0235  |
| Ankrd23     | 1428183_at   | ankyrin repeat domain 23                                    | -1.12          | 0.302   | -1.51            | 0.024   |

**Supplementary table S5: Affymetrix microarray analysis of fatty acid biosynthesis genes**

| Gene symbol | Probe set ID | Gene name                                            | HD+NS vs WT+NS |         | HD+GPA vs WT+GPA |         |
|-------------|--------------|------------------------------------------------------|----------------|---------|------------------|---------|
|             |              |                                                      | Fold change    | p value | Fold change      | p value |
| Pecr        | 1439167_at   | peroxisomal trans-2-enoyl-CoA reductase              | 1.45           | 0.547   | 1.83             | 0.275   |
| Prkag2      | 1451140_s_at | protein kinase, AMP-activated, gamma 2 non-catalytic | 1.21           | 0.221   | 1.79             | 0.05    |
| Scd3        | 1450956_at   | stearoyl-coenzyme A desaturase 3                     | 2.94           | 0.052   | 1.02             | 0.956   |
| Olah        | 1424855_at   | oleoyl-ACP hydrolase                                 | -1.35          | 0.657   | -2.46            | 0.165   |
| Mecr        | 1417097_at   | mitochondrial trans-2-enoyl-CoA reductase            | -1.09          | 0.614   | 1.20             | 0.0332  |
|             | 1417098_s_at | mitochondrial trans-2-enoyl-CoA reductase            | 1.18           | 0.18    | 1.27             | 0.0285  |
| Fads2       | 1419031_at   | fatty acid desaturase 2                              | -1.88          | 0.0457  | 1.16             | 0.715   |
| Fads3       | 1418773_at   | fatty acid desaturase 3                              | 1.52           | 0.55    | 2.58             | 0.0278  |
| Fasn        | 1423828_at   | fatty acid synthase                                  | 1.30           | 0.585   | 1.18             | 0.535   |
| Acly        | 1439445_x_at | ATP citrate lyase                                    | 1.75           | 0.522   | -4.79            | 0.05    |
| Pdk3        | 1426410_at   | pyruvate dehydrogenase kinase, isoenzyme 3           | -4.36          | 0.0667  | 2.25             | 0.163   |

**Supplementary table S5: Affymetrix microarray analysis of myogenic differentiation and early and late myogenic markers**

| Gene symbol | Probe set ID | Gene name                                   | HD+NS vs WT+NS |         | HD+GPA vs WT+GPA |         |
|-------------|--------------|---------------------------------------------|----------------|---------|------------------|---------|
|             |              |                                             | Fold change    | p value | Fold change      | p value |
| Myod1       | 1418420_at   | myogenic differentiation 1                  | -1.12          | 0.678   | -1.03            | 0.915   |
| Myog        | 1419391_at   | myogenin                                    | 1.36           | 0.204   | -1.17            | 0.0449  |
| Usmg2       | 1427781_at   | upregulated during skeletal muscle growth 2 | -1.19          | 0.0483  | -2.90            | 0.0151  |
| Des         | 1426731_at   | desmin                                      | 1.02           | 0.887   | -1.07            | 0.421   |

**Supplementary table S7: Affymetrix microarray analysis of muscle specific genes expression**

| Gene symbol | Probe set ID | Gene name                                                    | HD+NS vs WT+NS |         | HD+GPA vs WT+GPA |         |
|-------------|--------------|--------------------------------------------------------------|----------------|---------|------------------|---------|
|             |              |                                                              | Fold change    | p value | Fold change      | p value |
| Myh1        | 1427868_x_at | myosin, heavy polypeptide 1, skeletal muscle, adult          | -1.36          | 0.05    | -1.25            | 0.111   |
|             | 1427520_a_at |                                                              | 1.08           | 0.551   | -1.30            | 0.0493  |
|             | 1427867_at   |                                                              | 1.02           | 0.918   | -1.17            | 0.273   |
| Myh4        | 1458368_at   | myosin, heavy polypeptide 4, skeletal muscle                 | -1.23          | 0.423   | -1.60            | 0.153   |
| Mb          | 1451203_at   | myoglobin                                                    | -1.08          | 0.572   | -1.23            | 0.0144  |
| Tmod4       | 1449969_at   | tropomodulin 4                                               | -1.02          | 0.89    | -1.28            | 0.032   |
| Tmod2       | 1437167_at   | tropomodulin 2                                               | 1.13           | 0.722   | -1.83            | 0.446   |
| Ttn         | 1427446_s_at | titin                                                        | 1.06           | 0.675   | -1.25            | 0.0491  |
|             | 1431928_at   |                                                              | -1.20          | 0.383   | -1.33            | 0.0028  |
| Mybph       | 1419487_at   | myosin binding protein H                                     | 1.21           | 0.793   | -1.61            | 0.239   |
| Tpm1        | 1423049_a_at | tropomyosin 1, alpha                                         | 1.11           | 0.491   | -1.28            | 0.0393  |
| Mylk2       | 1427556_at   | myosin, light polypeptide kinase 2, skeletal muscle          | -1.23          | 0.377   | -1.82            | 0.0178  |
| Lmod1       | 1427485_at   | leiomodulin 1 (smooth muscle)                                | 1.49           | 0.19    | -2.88            | 0.0148  |
| Ckm         | 1417614_at   | creatine kinase, muscle                                      | 1.11           | 0.437   | -1.25            | 0.05    |
| Ckmt1       | 1432418_a_at | creatine kinase, mitochondrial 1, ubiquitous                 | -1.18          | 0.637   | -1.44            | 0.628   |
| Actn3       | 1418677_at   | actinin alpha 3                                              | 1.09           | 0.477   | -1.30            | 0.044   |
| Actn4       | 1423449_a_at | actinin alpha 4                                              | -1.20          | 0.26    | 1.31             | 0.0406  |
| Vim         | 1450641_at   | vimentin                                                     | -1.28          | 0.295   | 1.14             | 0.525   |
| Actn4       | 1423449_a_at | actinin alpha 4                                              | -1.20          | 0.26    | 1.31             | 0.0406  |
| Actn3       | 1418677_at   | actinin alpha 3                                              | 1.09           | 0.477   | -1.30            | 0.044   |
| Myo6        | 1435559_at   | myosin VI                                                    | 1.16           | 0.804   | 2.37             | 0.0245  |
| Myo5a       | 1431320_a_at | myosin Va                                                    | -1.24          | 0.402   | 1.79             | 0.0395  |
| Mybpc2      | 1455736_at   | myosin binding protein C, fast-type                          | 1.05           | 0.65    | -1.35            | 0.0389  |
| Myohd1      | 1459265_at   | myosin head domain containing 1                              | 1.13           | 0.595   | -1.49            | 0.0424  |
| Myo1d       | 1447006_at   | Myosin ID                                                    | -1.02          | 0.94    | -1.84            | 0.05    |
|             | 1459102_at   |                                                              | 1.86           | 0.217   | -3.31            | 0.0382  |
|             | 1446620_at   |                                                              | -1.84          | 0.049   | -1.07            | 0.801   |
|             | 1444515_at   |                                                              | -2.33          | 0.044   | 1.27             | 0.255   |
| Myo1e       | 1449941_at   | myosin IE                                                    | -2.59          | 0.0465  | 1.74             | 0.379   |
| Sepw1       | 1416521_at   | selenoprotein W, muscle 1                                    | 1.14           | 0.326   | -1.18            | 0.0357  |
| Casq1       | 1422598_at   | calsequestrin 1                                              | -1.04          | 0.742   | -1.40            | 0.0156  |
| Pde6h       | 1450766_at   | phosphodiesterase 6H, cGMP-specific, cone, gamma             | 1.66           | 0.473   | -2.41            | 0.0361  |
| Pde4b       | 1442700_at   | phosphodiesterase 4B, cAMP specific                          | -1.96          | 0.0048  | -1.50            | 0.132   |
| Lsp1        | 1417756_a_at | lymphocyte specific 1                                        | -1.57          | 0.0541  | -1.33            | 0.0527  |
| Cacnb1      | 1426108_s_at | calcium channel, voltage-dependent, beta 1 subunit           | 1.03           | 0.885   | -1.24            | 0.0094  |
| Pdlim3      | 1449178_at   | PDZ and LIM domain 3                                         | -1.08          | 0.652   | -1.24            | 0.0283  |
| Denr        | 1449598_at   | Density-regulated protein                                    | -2.63          | 0.179   | 3.27             | 0.0166  |
| Dusp9       | 1433844_a_at | dual specificity phosphatase 9                               | -1.20          | 0.674   | -2.25            | 0.042   |
| Dusp6       | 1415834_at   | dual specificity phosphatase 6                               | -1.44          | 0.0408  | -1.00            | 0.986   |
| Dusp16      | 1440651_at   | Dual specificity phosphatase 16                              | -2.80          | 0.0399  | -1.72            | 0.471   |
| Chrnbl      | 1420682_at   | cholinergic receptor, nicotinic, beta polypeptide 1 (muscle) | 1.22           | 0.44    | 1.53             | 0.0373  |
| Cfl2        | 1418067_at   | cofilin 2, muscle                                            | 1.14           | 0.332   | -1.11            | 0.0395  |
| Eno3        | 1417951_at   | enolase 3, beta muscle                                       | 1.12           | 0.439   | -1.22            | 0.05    |
| Pfkm        | 1416780_at   | phosphofructokinase, muscle                                  | 1.03           | 0.803   | -1.31            | 0.0332  |
| Mbnl3       | 1441530_at   | Muscleblind-like 3 (Drosophila)                              | -1.25          | 0.739   | -5.04            | 0.0092  |
| Capza2      | 1423058_at   | capping protein (actin filament) muscle Z-line, alpha 2      | -1.18          | 0.0463  | 1.00             | 0.977   |
| Gem         | 1426063_a_at | GTP binding protein (gene overexpressed in skeletal muscle)  | -1.48          | 0.015   | -1.14            | 0.653   |
| Tnni1       | 1450813_a_at | troponin I, skeletal, slow 1                                 | -1.12          | 0.601   | -1.59            | 0.0398  |
| Tnni2       | 1438609_x_at | troponin I, skeletal, fast 2                                 | 1.11           | 0.343   | 1.64             | 0.0422  |
| Flna        | 1426677_at   | filamin, alpha                                               | -1.68          | 0.253   | 1.15             | 0.415   |

## Supplementary table S8:

### Primer sequences used for quantitative Real time PCR

| Gene name               | GeneSequence   | Forward primer            | Reverse primer           |
|-------------------------|----------------|---------------------------|--------------------------|
| <b>Primer sequence:</b> |                |                           |                          |
| PGC-1 $\alpha$ (H)      | NM_013261      | tgagagggccaagcaaag        | ataaatcacacggcgctctt     |
| PGC-1 $\beta$ (H)       | NM_133263      | ggcaggcctcagatctaaaa      | tcatgggagccttctgtct      |
| NRF-1 (H)               | NM_005011      | ccatctggtggcctgaag        | gtgcctgggtccatgaaa       |
| TFAM (H)                | NM_003201      | gaacaactacctatattaaagctca | gaatcaggaagttccctcca     |
| PPRC1 (H)               | NM_015062.3    | atthtgggagccttgagaga      | tgagcagcgacacttcattc     |
| PPARA (H)               | NM_001001928.2 | gacttggaactggatgacag      | tttagaaggccaggacgatct    |
| PPARG (H)               | NM_138711.3    | gacctgaaactcaagagtacaaa   | tgaggcttattgtagagctgagtc |
| ALAS1 (H)               | NM_000688.4    | gaaatgaatgccgtgaggaa      | cctccatcggttttcacact     |
| $\beta$ -actin (H)      | NM_001101.2    | ccaaccgcgagaagatga        | ccagaggcgtacagggatag     |
| CYT C (H)               | NM_018947.4    | tggagttttgcatgtggt        | gagccaaggcaagtggac       |
| COX-IV (H)              | BC_021236.2    | caccgcgctcgttateat        | tggccaccactctttgt        |
| Myoglobin (H)           | NM_005368      | cagttggtgctgaacgtctg      | ggtgaccctaaagagcctga     |
| MYHC I                  | NM_030679.1    | aatcaaaggtcaaggcctaaa     | gaattggccaggttgacat      |
| MYHC IIA (M)            | NM_001039545.1 | aacttcaggcaaaagtgaaatctt  | gctagattggtgttgattgttc   |
| MYHC IIX/D (M)          | DQ021873.1     | ggtcgaagttgcatccctaa      | ttccggaggaaggagcag       |
| MYHC IIB (M)            | AY963801.1     | ctcaaacccttaaagtactgtctga | ctattggtggcagctcagg      |
| TNNI1 (slow) (H)        | NM_003283      | ttgactacatgggggaggaa      | gacagctcctgggctttct      |
| TNNI2 (fast) (H)        | NM_003282.2    | gctccaagctcaggacctc       | gctatctgcagcatcacactct   |

H=Human, M= Mouse

### Mouse Sequence (ABI TaqMan Gene expression assays)

| Gene name                 | TaqMan probe set ID |
|---------------------------|---------------------|
| PGC-1 $\alpha$            | Mm00447183_m1       |
| PGC-1 $\beta$             | Mm00504720_m1       |
| NRF-1                     | Mm00447996_m1       |
| NRF-2                     | Mm00477784_m1       |
| TFAM                      | Mm00447485_m1       |
| AMPK                      | Mm01264787_m1       |
| CREB                      | Mm00501607_m1       |
| ERR- $\alpha$             | Mm00433143_m1       |
| COX-IV                    | Mm00446387_m1       |
| Troponin I, skeletal fast | Mm00437157_g1       |
| Troponin I, skeletal slow | Mm00502426_m1       |
| Myoglobin                 | Mm00442968_m1       |
| PPAR $\alpha$             | Mm00440939_m1       |
| PPAR $\delta$             | Mm00803186_m1       |
| CYTC                      | Mm01621044_g1       |

**Supplementary table S9:**

**Demographic and genetic data of control subjects and HD patients. Muscle biopsies were obtained from control subjects and HD patients and used for myoblast culture.**

| <b>Muscle biopsy code</b> | <b>Genotype</b> | <b>Age in years (at biopsy)</b> | <b>Gender</b> | <b>CAG repeats</b> |
|---------------------------|-----------------|---------------------------------|---------------|--------------------|
| HD21401                   | HD              | 68                              | M             | 18/40              |
| HD25401                   | HD              | 62                              | F             | 10/42              |
| HD17801                   | HD              | 36                              | M             | 16/49              |
| HD21102                   | HD              | 32                              | M             | 17/58              |
| HD17803                   | HD              | 46                              | M             | 17/51              |
| HD7411                    | HD              | 58                              | M             | 10/44              |
| HD16101                   | HD              | 67                              | M             | 17/42              |
| Ravera                    | HD              | 40                              | M             | 18/48              |
|                           |                 |                                 |               |                    |
| Control 8022              | Control         | 36                              | M             | -                  |
| Control 7931              | Control         | 50                              | M             | -                  |
| Control 7865              | Control         | 48                              | M             | -                  |
| Control 8413              | Control         | 68                              | F             | -                  |
| Control 7843              | Control         | 61                              | F             | -                  |
| Sebastiano                | Control         | 27                              | M             | -                  |
| Valentino                 | Control         | 48                              | M             | -                  |
| Cardiol                   | Control         | 51                              | F             | -                  |

Supplementary Figure S1:

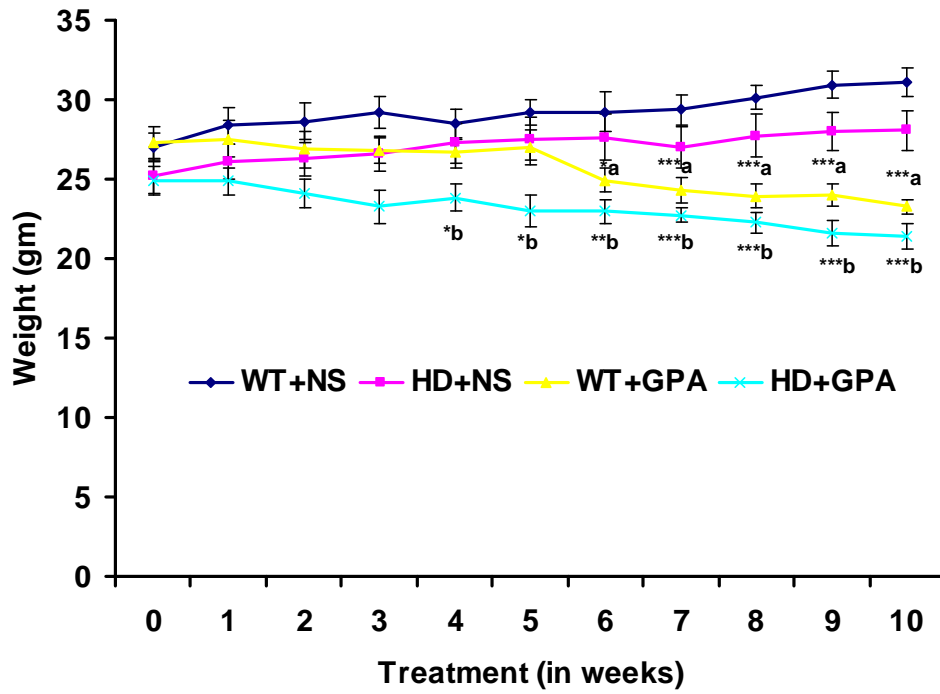

Supplementary Figure S2:

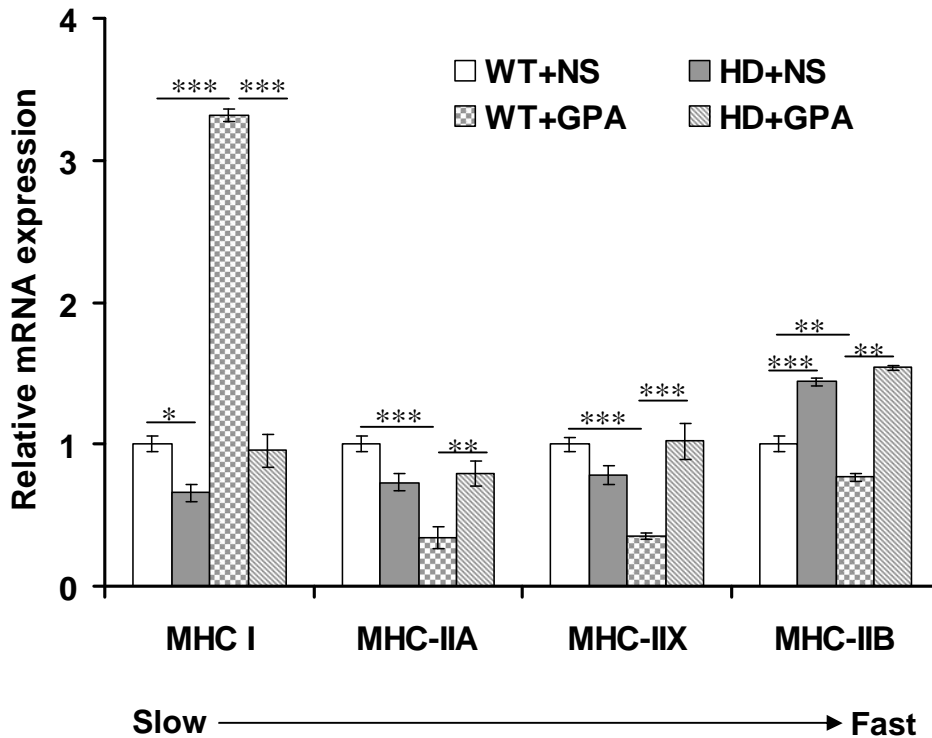

Supplementary Figure S3:

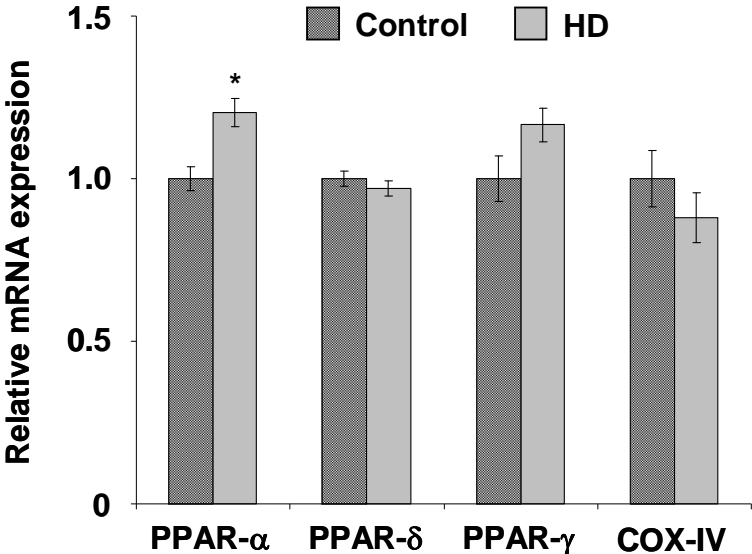

Supplementary Figure S4:

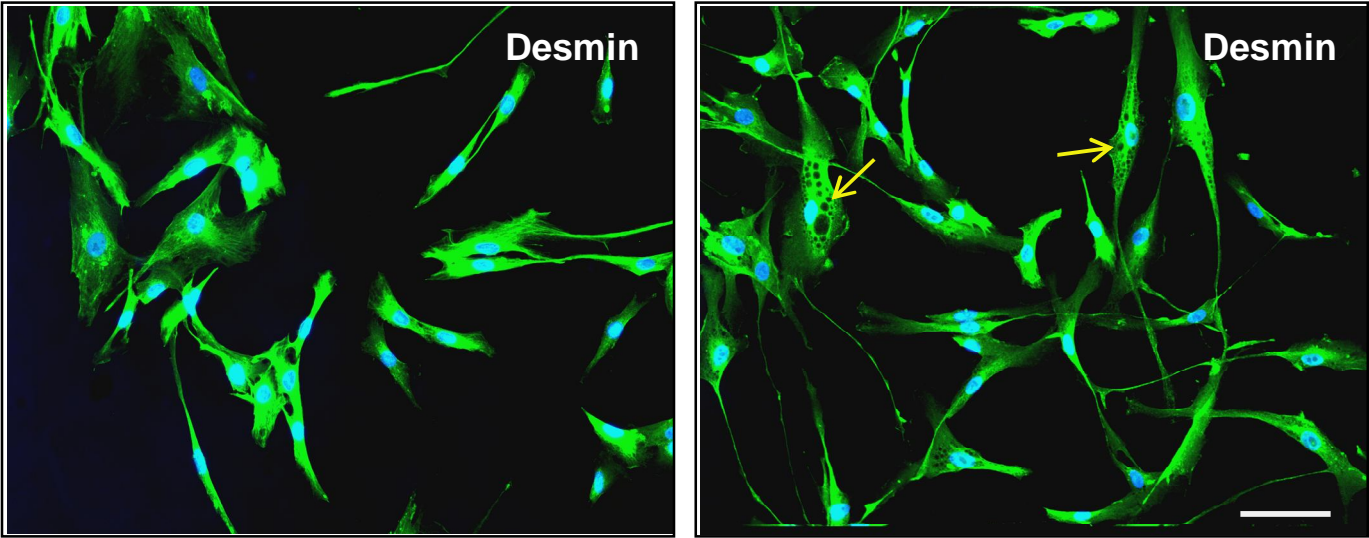

Supplementary Figure S5:

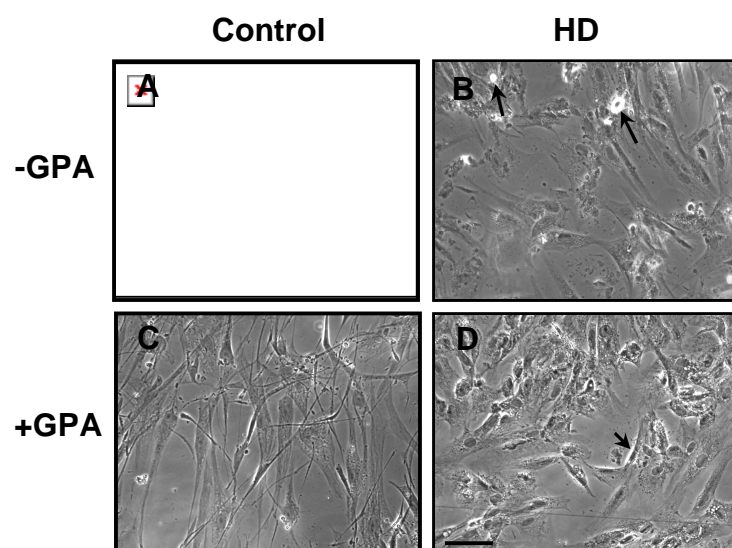

Supplementary Figure S6:

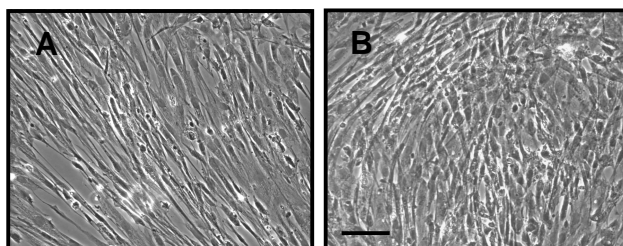



Supplementary Figure S7: Time points for experiments

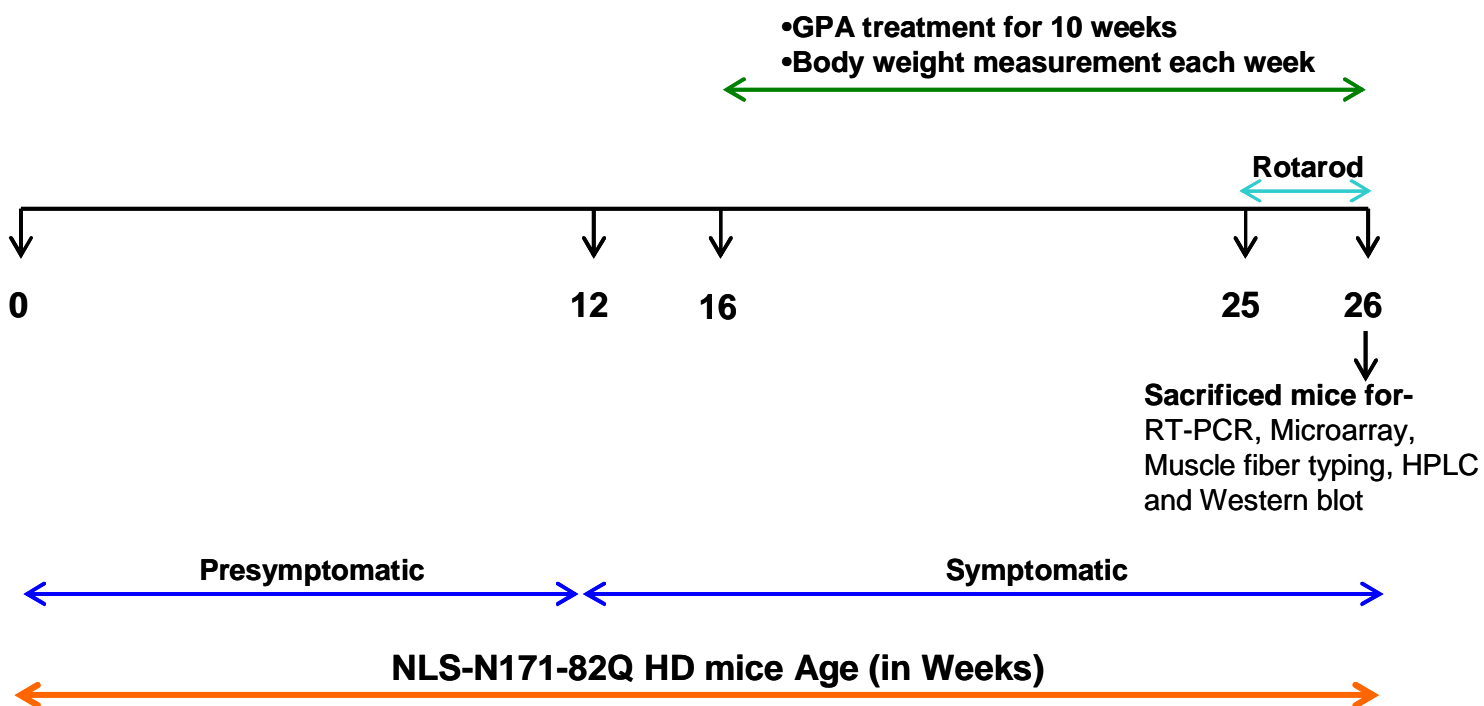

## Supplemental figures

**Figure S1:** Body weight of WT and NLS-N171-82Q HD mice treated with either normal saline (NS) or catabolic stressor  $\beta$ -guanidinopropionic acid (GPA). GPA treatment caused significant reduction in body weight in WT and HD mice. \* $p < 0.05$ , \*\* $p < 0.01$ , \*\*\* $p < 0.001$ . a=versus WT+NS and b=versus HD+NS mice. (n=9-11 mice /group)

**Figure S2:** Relative mRNA expression of different isoforms of Myosin heavy chain (MHC) in soleus muscles from WT and NLS-N171-82Q HD mice treated with NS or GPA. mRNA levels were normalized to  $\beta$ -actin. Data are expressed as mean  $\pm$  SEM. \* $p < 0.05$ , \*\* $p < 0.01$ , \*\*\* $p < 0.001$  (n=5 mice in each group).

**Figure S3:** Quantitative real-time PCR analysis in RNA isolated from muscle biopsies from symptomatic human HD patients and matched control subjects. Relative mRNA expression of PPAR- $\alpha$ ,  $\delta$ ,  $\gamma$  and COXIV was measured by normalizing values to  $\beta$ -actin. (n=9 control subjects and n=13 HD patients), Data are expressed as mean  $\pm$  SEM. \* $p < 0.05$ .

**Figure S4:** Characterization of myoblast culture derived from human muscle biopsies of control subjects and HD patients. Myoblast cultures were immunostained with muscle specific marker desmin. Arrows indicate the presence of apoptotic vacuoles in HD myoblast. (Scale bar=50 $\mu$ m)

**Figure S5:** Morphological analysis of proliferating myoblasts cultures derived from muscle biopsies from control subjects and symptomatic HD patients. Proliferating myoblasts were grown in presence of 15% fetal bovine serum. Morphological characterization of control (A) and HD (B) myoblasts revealed an irregular morphology and presence of vacuoles in HD myoblast as compared to control myoblasts. GPA treatment of HD myoblasts (C) further increased the impairment of morphology and number of vacuoles as compared to GPA treated control myoblasts (D). (Scale bar=50 $\mu$ m)

**Figure S6:** Myoblasts cultures derived from muscle biopsies from control subjects and symptomatic HD patients were differentiated into myotubes by culturing in presence of 5% FBS. An irregular morphology and alignment was observed in HD myotubes (A), while control myotubes were typical myotubes morphology (B). (Scale bar=50 $\mu$ m)

**Figure S7:** Time line for GPA treatment and complete experiment. GPA treatment was started at 16<sup>th</sup> week of NLS-N171-82Q age and continued till 26<sup>th</sup> week. Rotarod was started at 25<sup>th</sup> week. Mice were sacrificed at 26<sup>th</sup> week of age for measurement of different biochemical parameters.
